# Supplementary material
Source: PubMed Central journal article supplement (PMC3770085)
Supplement: supp_M039206_jlr.M039206-1.pdf [file supp_M039206_jlr.M039206-1.pdf]

## SUPPLEMENTARY DATA

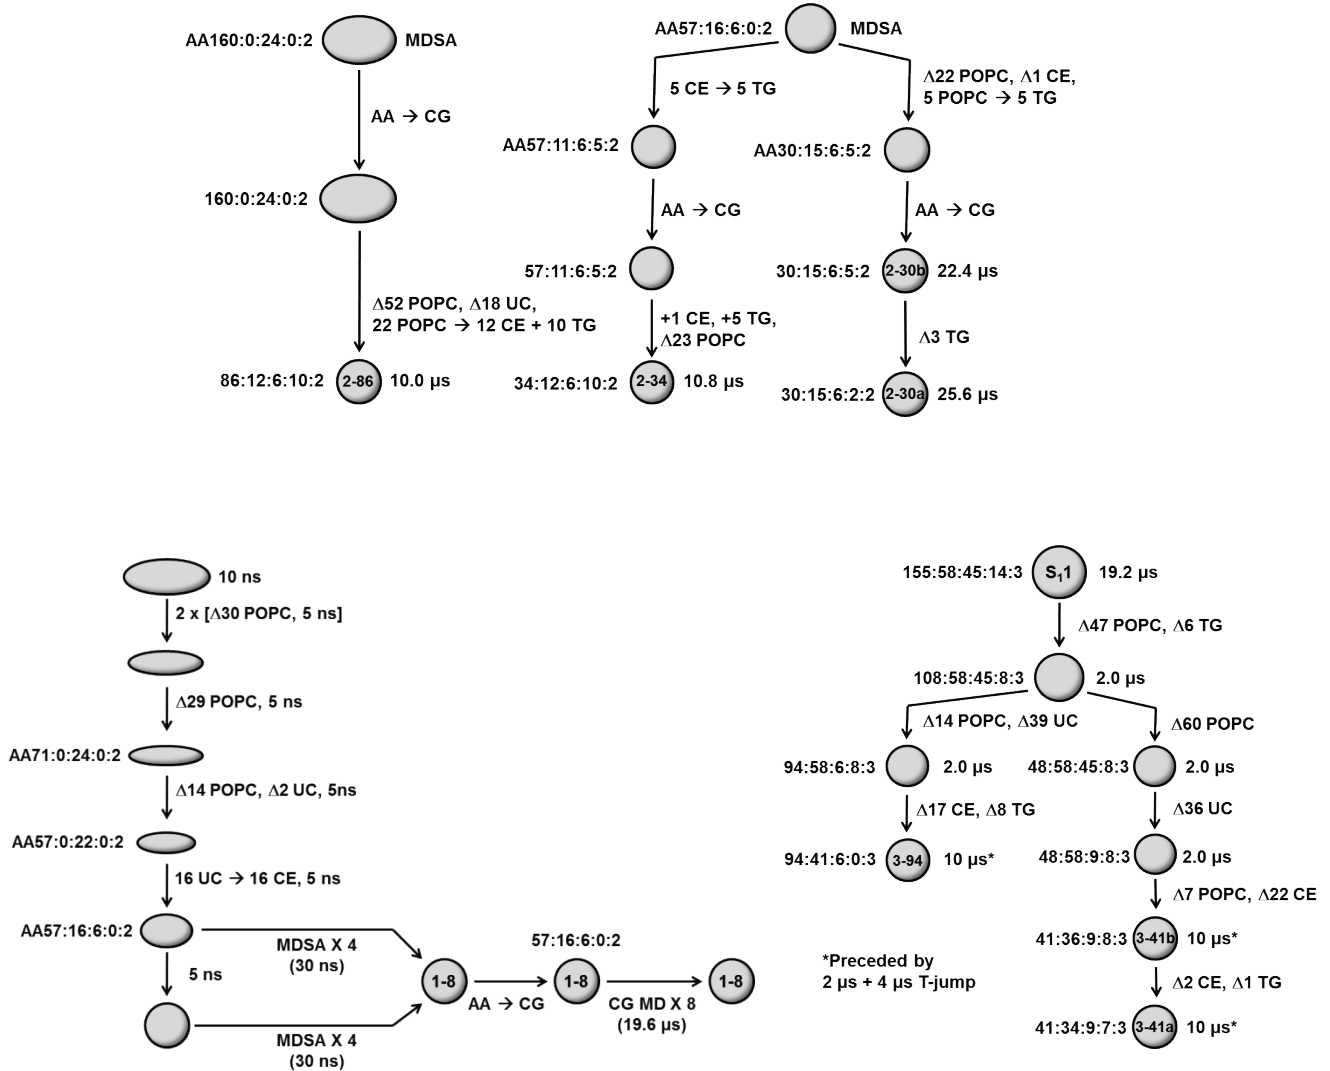

**Figure S1A. Flow diagrams for the construction and MD simulation of AA and CG sHDL particles.** Upper panels show the construction and simulation of some of the particles with two apoA-I: S2-86, S2-34, S2-30a, and S2-30b. Lower left panel shows the construction and simulation of the rest of the particles with two apoA-I: AA and CG S2-57. Lower right panel shows the construction and simulation of some of the particles with three apoA-I: S3-94, S3-41a, and S3-41b.

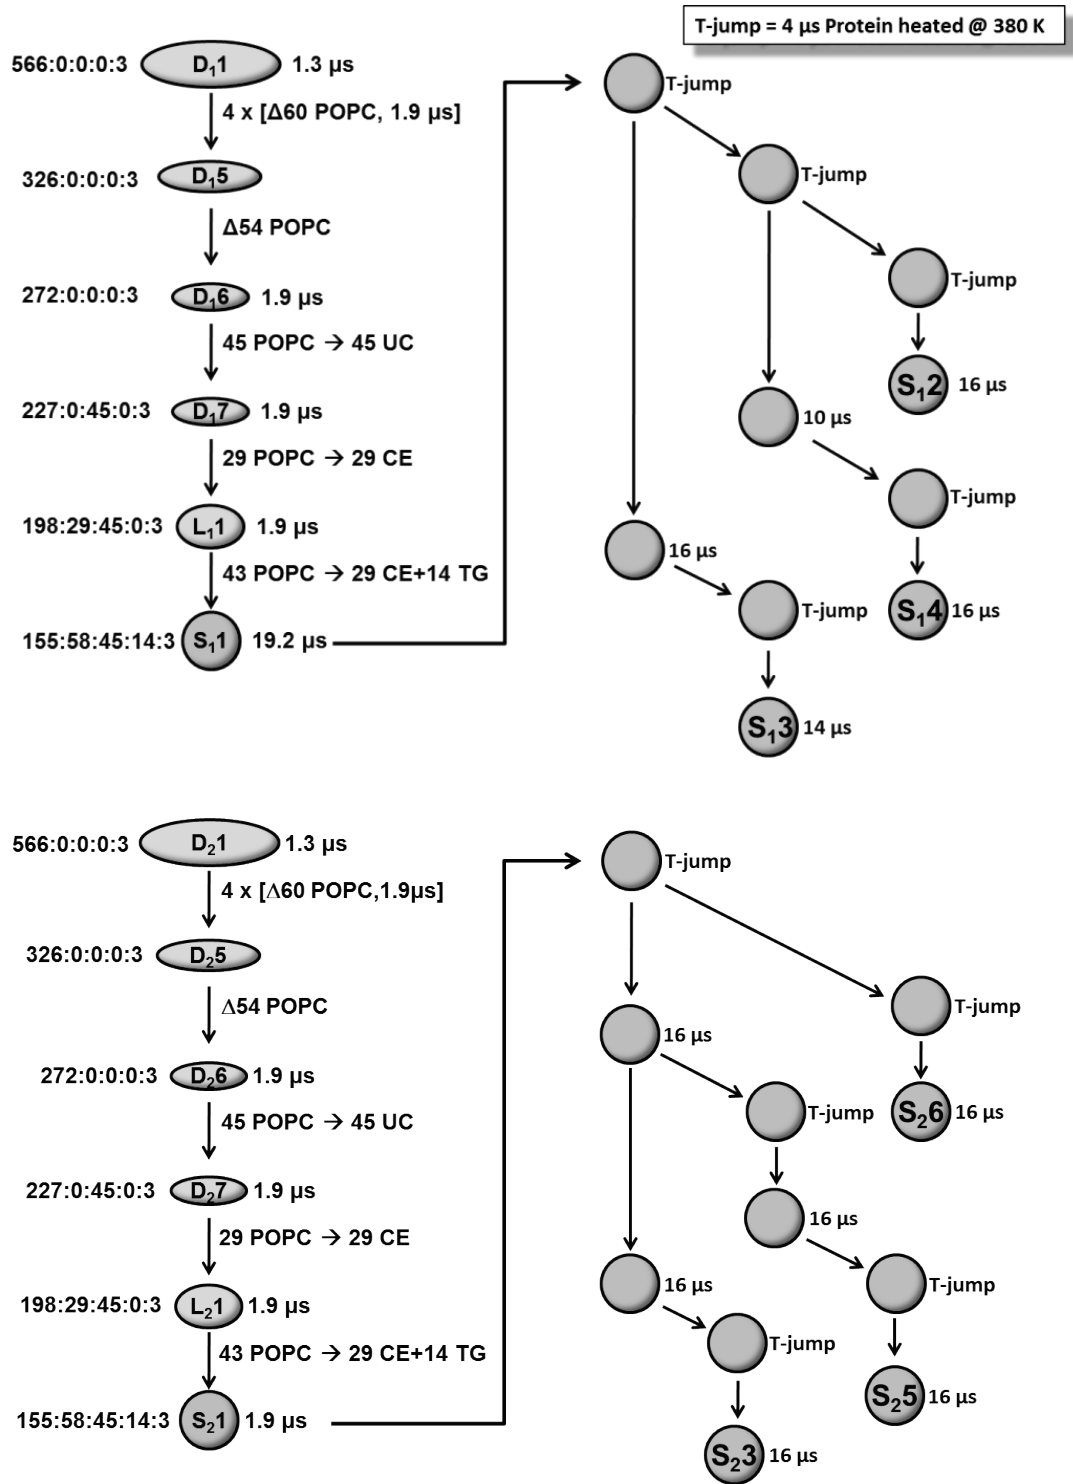

**Figure S1B. Flow diagrams for the construction and MD simulation of CG sHDL particles.** Upper and lower panels show construction and simulation of the remaining particles with three apoA-I: S3-155.

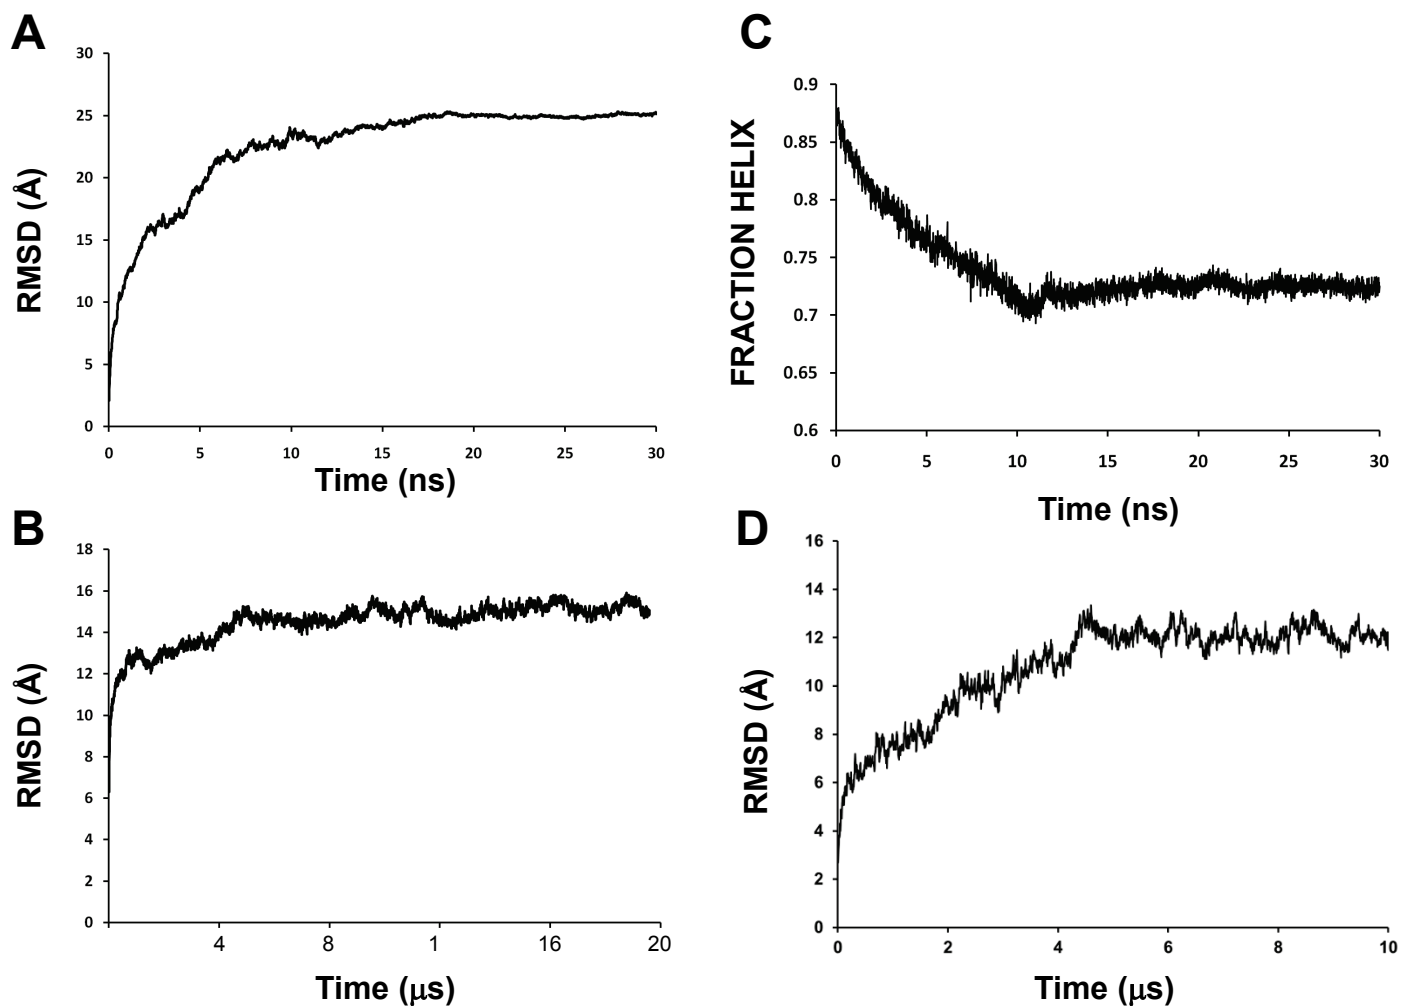

**Figure S2. Equilibration dynamics of S2-57 and S3-41 particles.** **A.** Average RMSD changes with time during the eight 30 ns MDSA simulations of S2-57. **B.** Average RMSD changes with time during the eight 19.6 μs CGMD simulations of S2-57. **C.** Average changes in total helicity with time during the eight MDSA simulations of S2-57. **D.** RMSD changes with time during the 10.0 μs CGMD simulation of S3-41.

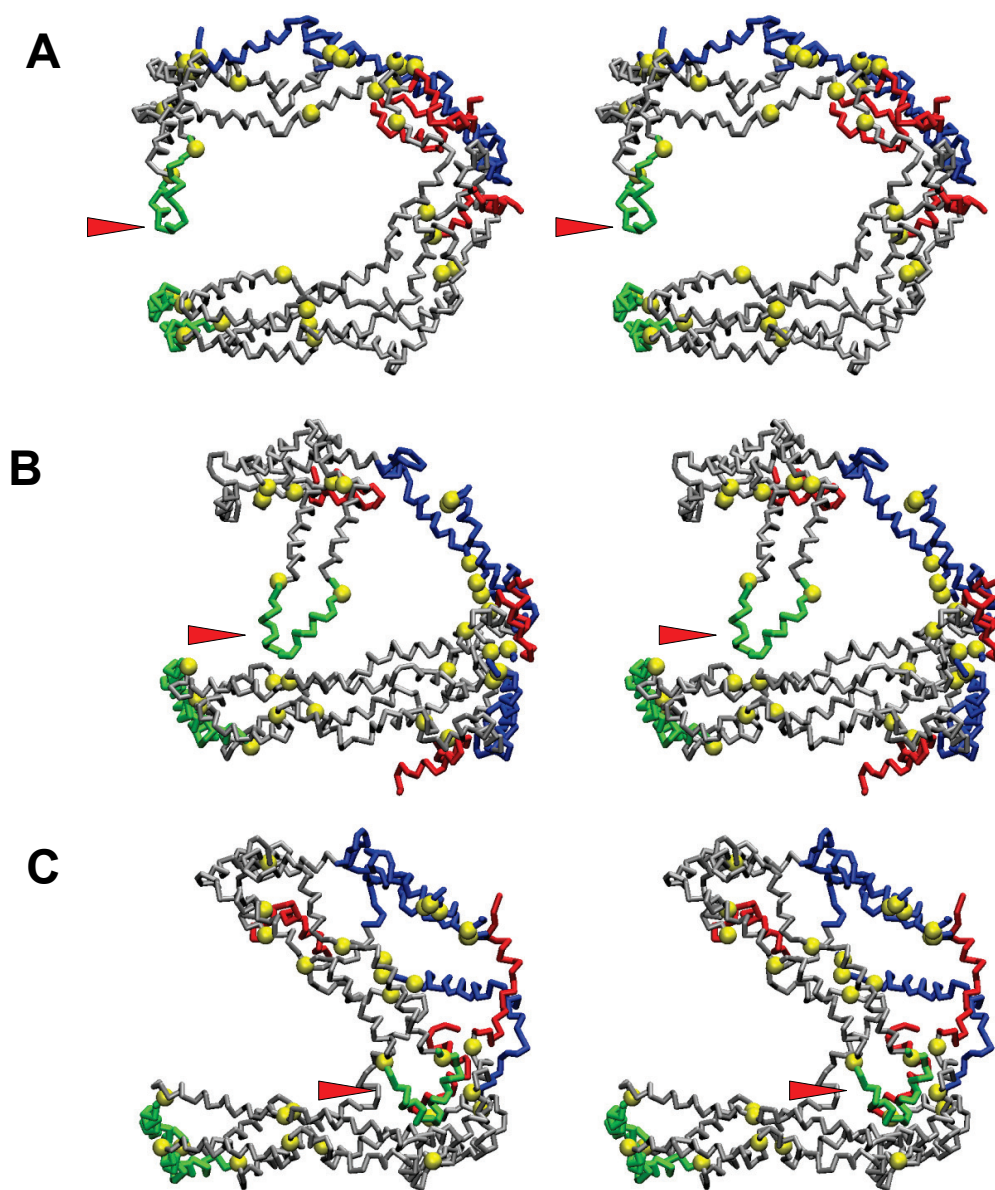

**Figure S3. Three CGMD simulation frames illustrating the dynamics of motion of the hairpin portion of S3-155.** The hairpin portion of the model swings in a right handed spiral (red arrowheads) from the helix 5 pair to the N-terminal domains with time of simulation. Protein backbone color code: Aligned residues 78-188, green; residues 1-43, blue; helix 10, red; prolines, yellow spacefilling; remainder, silver.
